# Supplementary material for: Molecular phylogenies confirm the presence of two cryptic Hemimycale species in the Mediterranean and reveal the polyphyly of the genera Crella and Hemimycale (Demospongiae: Poecilosclerida)
Source: PeerJ journal article supplement (doi:10.7717/peerj.2958), 2017-03-07
Supplement: Figure_S3.pdf [file Figure_S3.pdf]

COI

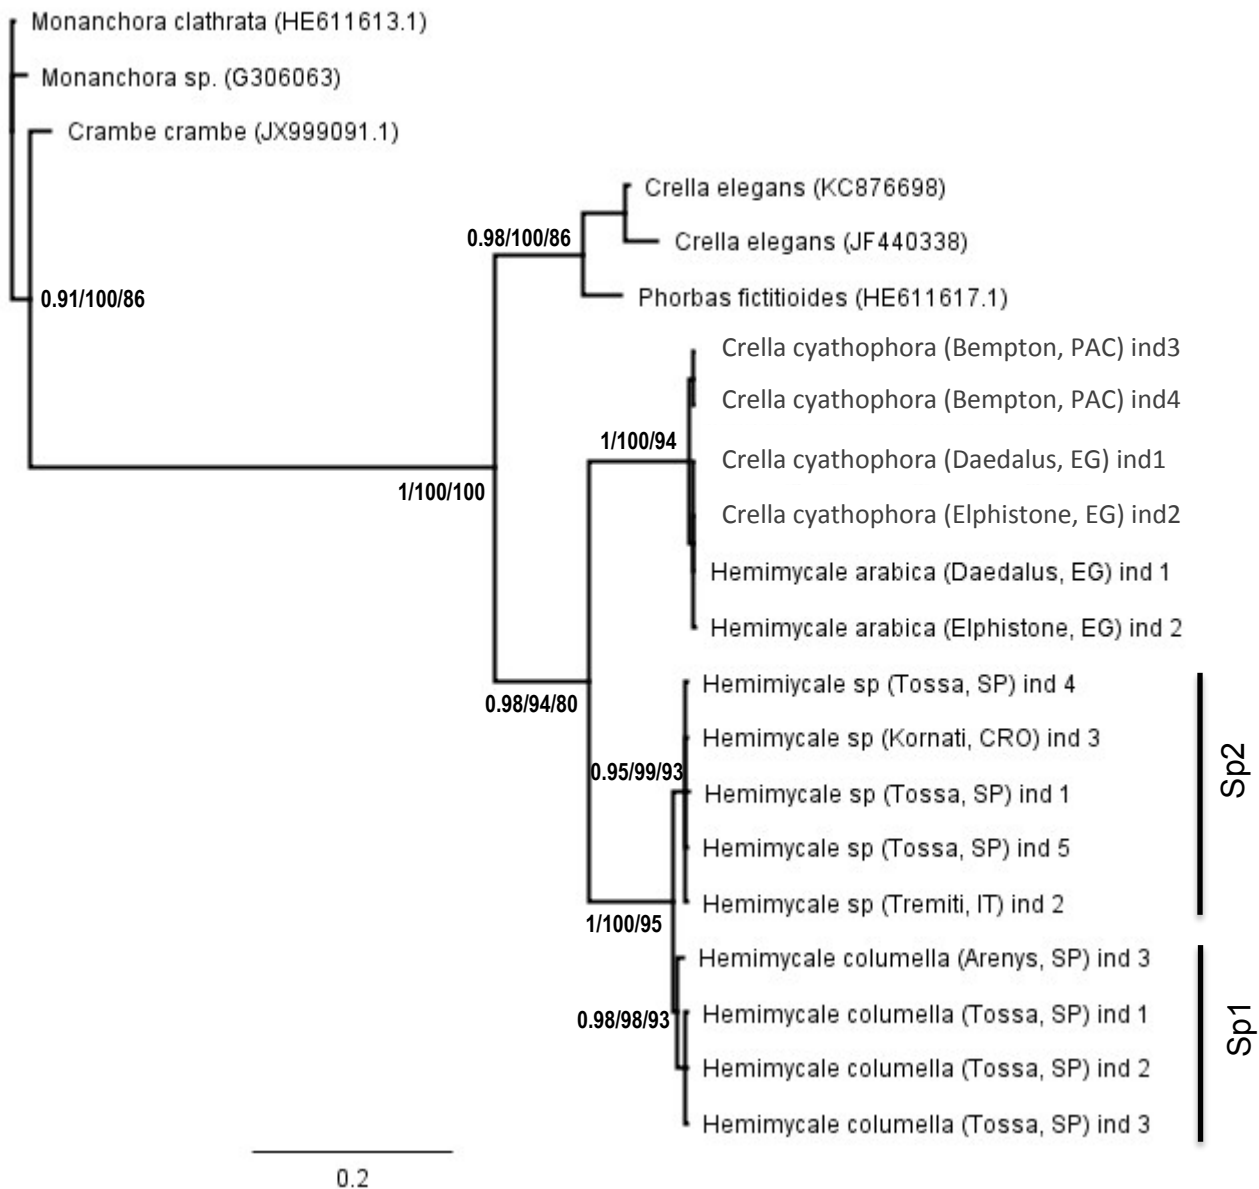

BI/NJ/ML
